# Supplementary material
Source: PubMed Central journal article supplement (PMC7709959)

## ***Supporting Information***

Tryptoquivalines W and X, two new compounds from a Hawaiian fungal strain and their biological activities

KH Ahammad Uz Zaman<sup>a</sup>, Zhenquan Hu<sup>b,c</sup>, Xiaohua Wu<sup>a</sup> and Shugeng Cao<sup>a,d,\*</sup>

<sup>a</sup> Daniel K. Inouye College of Pharmacy, University of Hawaii at Hilo, 200 West Kawili Street, Hilo, Hawai'i 96720, United States

<sup>b</sup> Warshel Institute for Computational Biology, The Chinese University of Hong Kong, Shenzhen, People's Republic of China

<sup>c</sup> School of Chemistry and Materials Science, University of Science and Technology of China, People's Republic of China

<sup>d</sup> Cancer Biology Program, University of Hawaii Cancer Center, 701 Ilalo Street, Honolulu, Hawai'i 96813, United States

## Table of Contents

| Figures    | Content                                                                          | Page |
|------------|----------------------------------------------------------------------------------|------|
| Figure S1  | HRESIMS of compound <b>1</b>                                                     | 3    |
| Figure S2  | <sup>13</sup> C NMR spectrum of compound <b>1</b> in CD <sub>3</sub> OD (400MHz) | 4    |
| Figure S3  | HSQC spectrum of compound <b>1</b> in CD <sub>3</sub> OD (400MHz)                | 5    |
| Figure S4  | COSY spectrum of compound <b>1</b> in CD <sub>3</sub> OD (400MHz)                | 6    |
| Figure S5  | HMBC spectrum of compound <b>1</b> in CD <sub>3</sub> OD (400MHz)                | 7    |
| Figure S6  | IR spectrum of compound <b>1</b>                                                 | 8    |
| Figure S7  | HRESIMS of compound <b>2</b>                                                     | 9    |
| Figure S8  | <sup>1</sup> H NMR spectrum of compound <b>2</b> in CD <sub>3</sub> OD (400MHz)  | 10   |
| Figure S9  | HSQC spectrum of compound <b>2</b> in CD <sub>3</sub> OD (400MHz)                | 11   |
| Figure S10 | COSY spectrum of compound <b>2</b> in CD <sub>3</sub> OD (400MHz)                | 12   |
| Figure S11 | HMBC spectrum of compound <b>2</b> in CD <sub>3</sub> OD (400MHz)                | 13   |
| Figure S12 | IR spectrum of compound <b>2</b>                                                 | 14   |

Figure S1: HRESIMS of compound 1

KH Ahammad Zaman ZS 15

SYNAPTG2-Si#NotSet

Synapt\_23871 281 (2.609)

14:02:46

1: TOF MS ES+

5.88e6

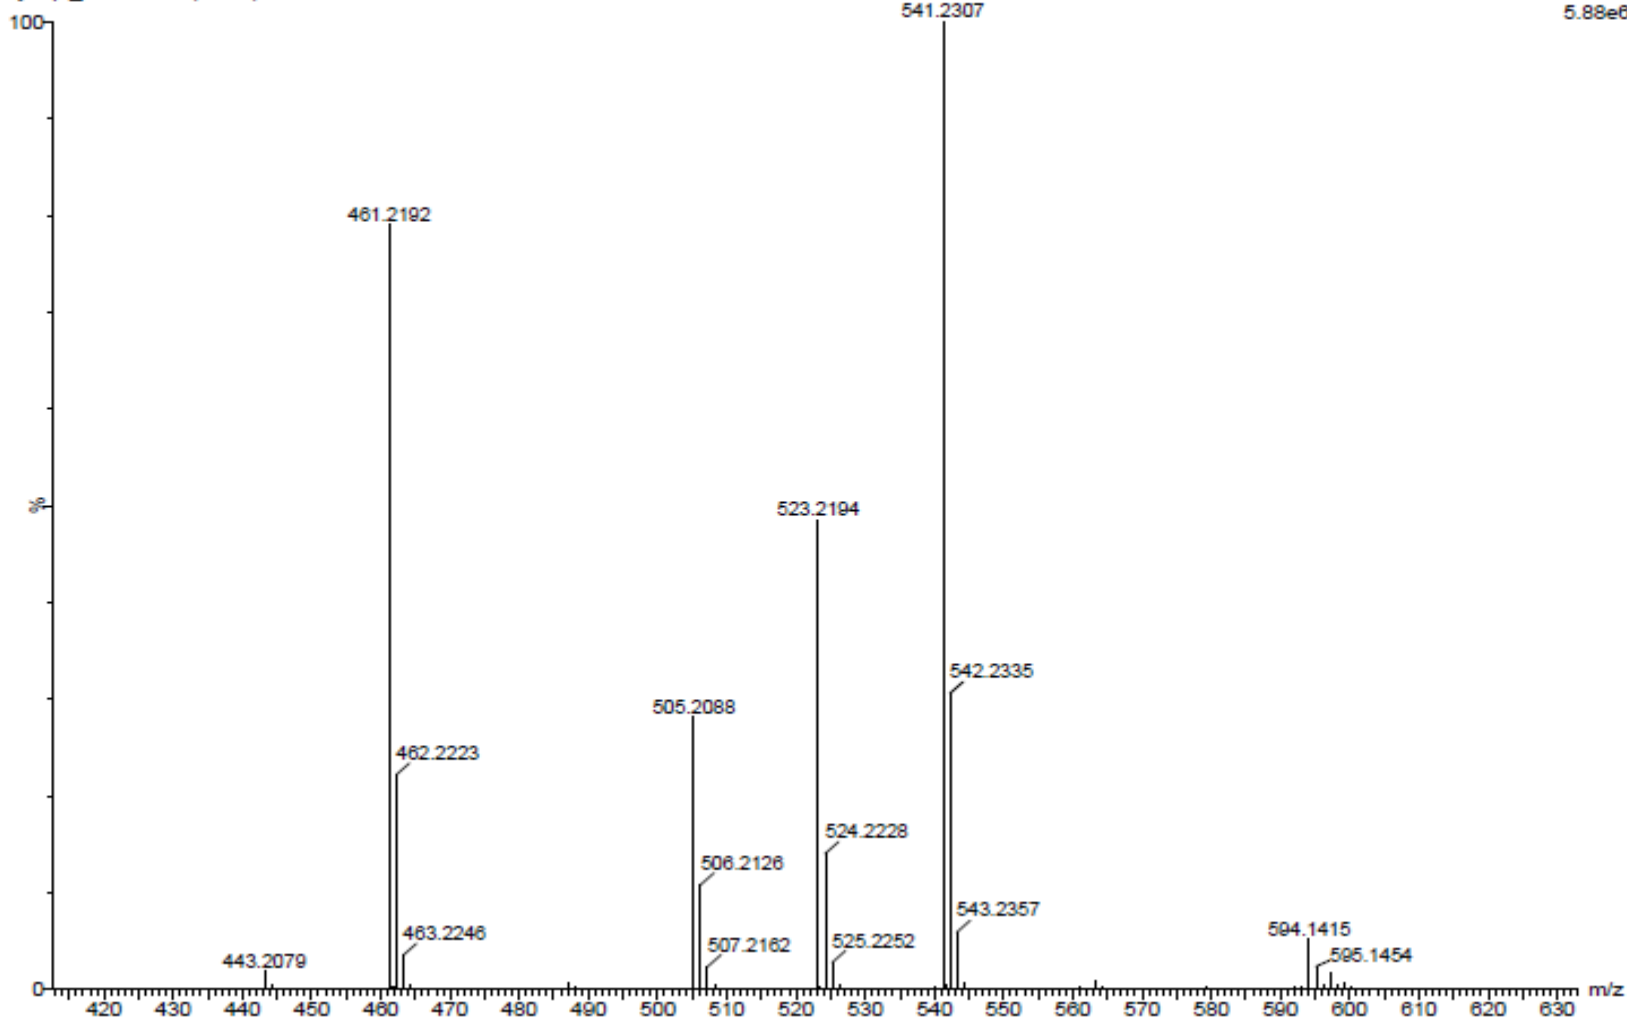

Figure S2:  $^1\text{H}$  NMR spectrum of compound 1 in  $\text{CD}_3\text{OD}$  (400MHz)

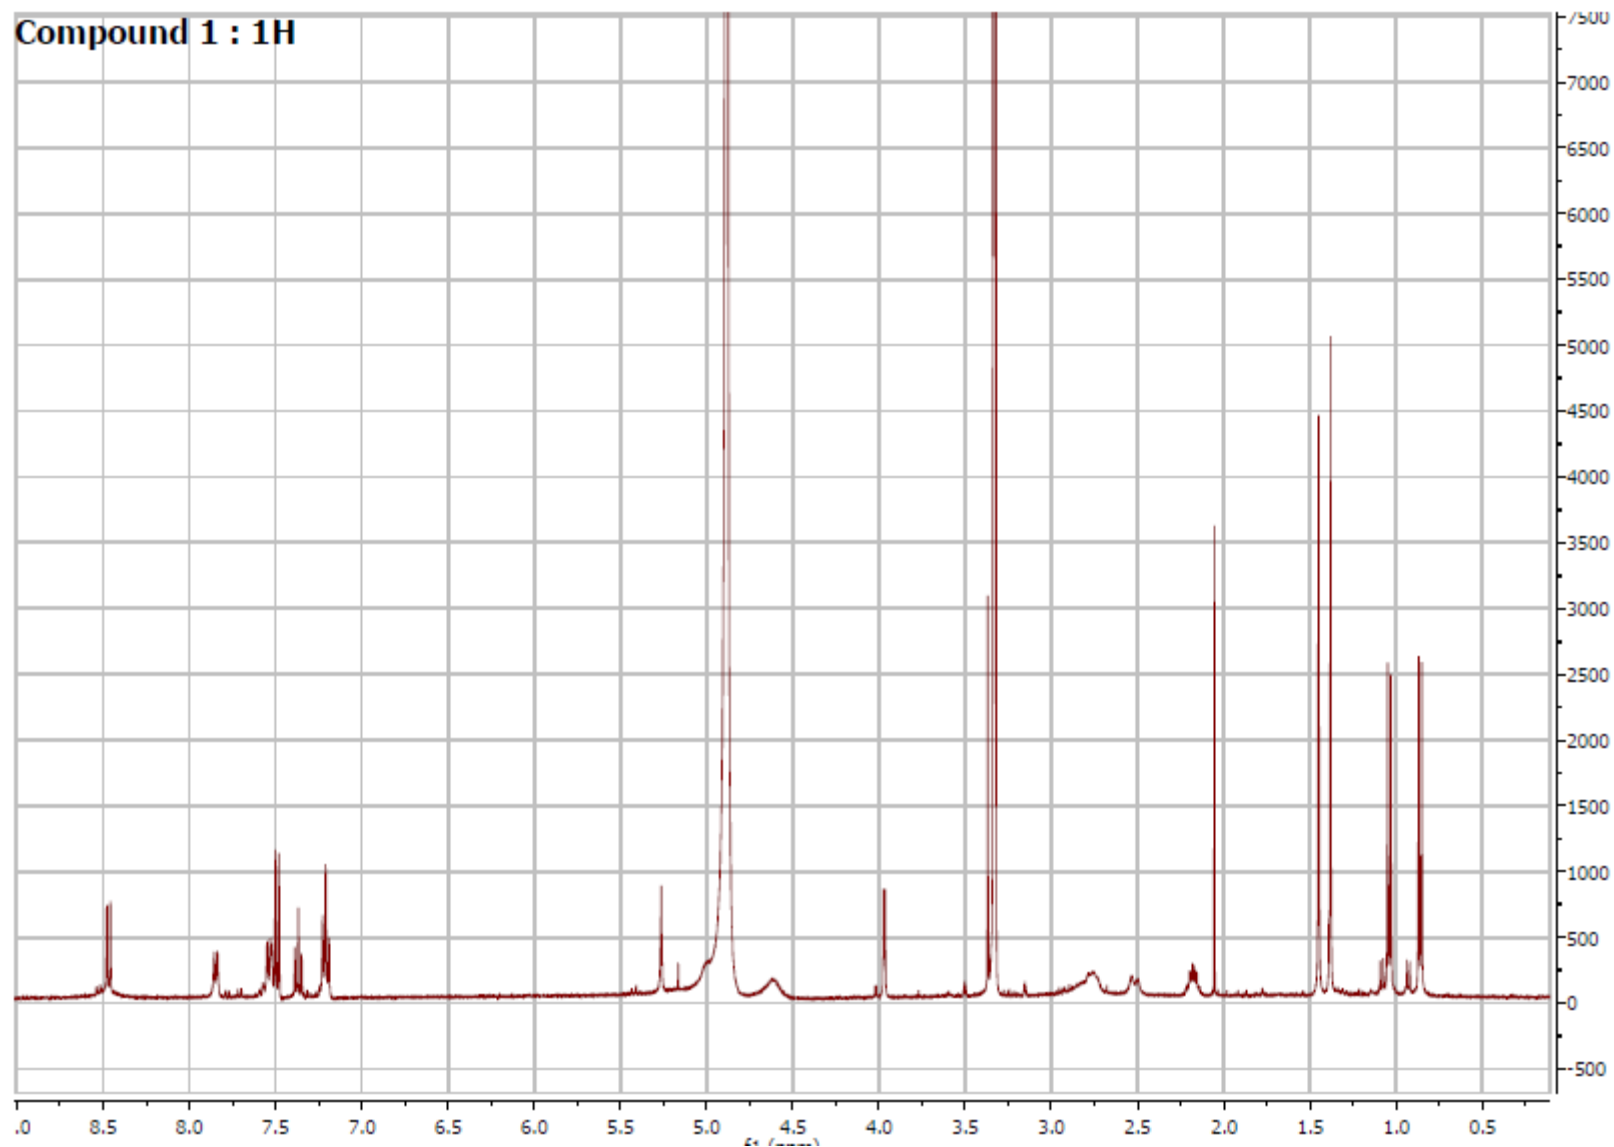

Figure S3: HSQC spectrum of compound 1 in CD<sub>3</sub>OD (400MHz)

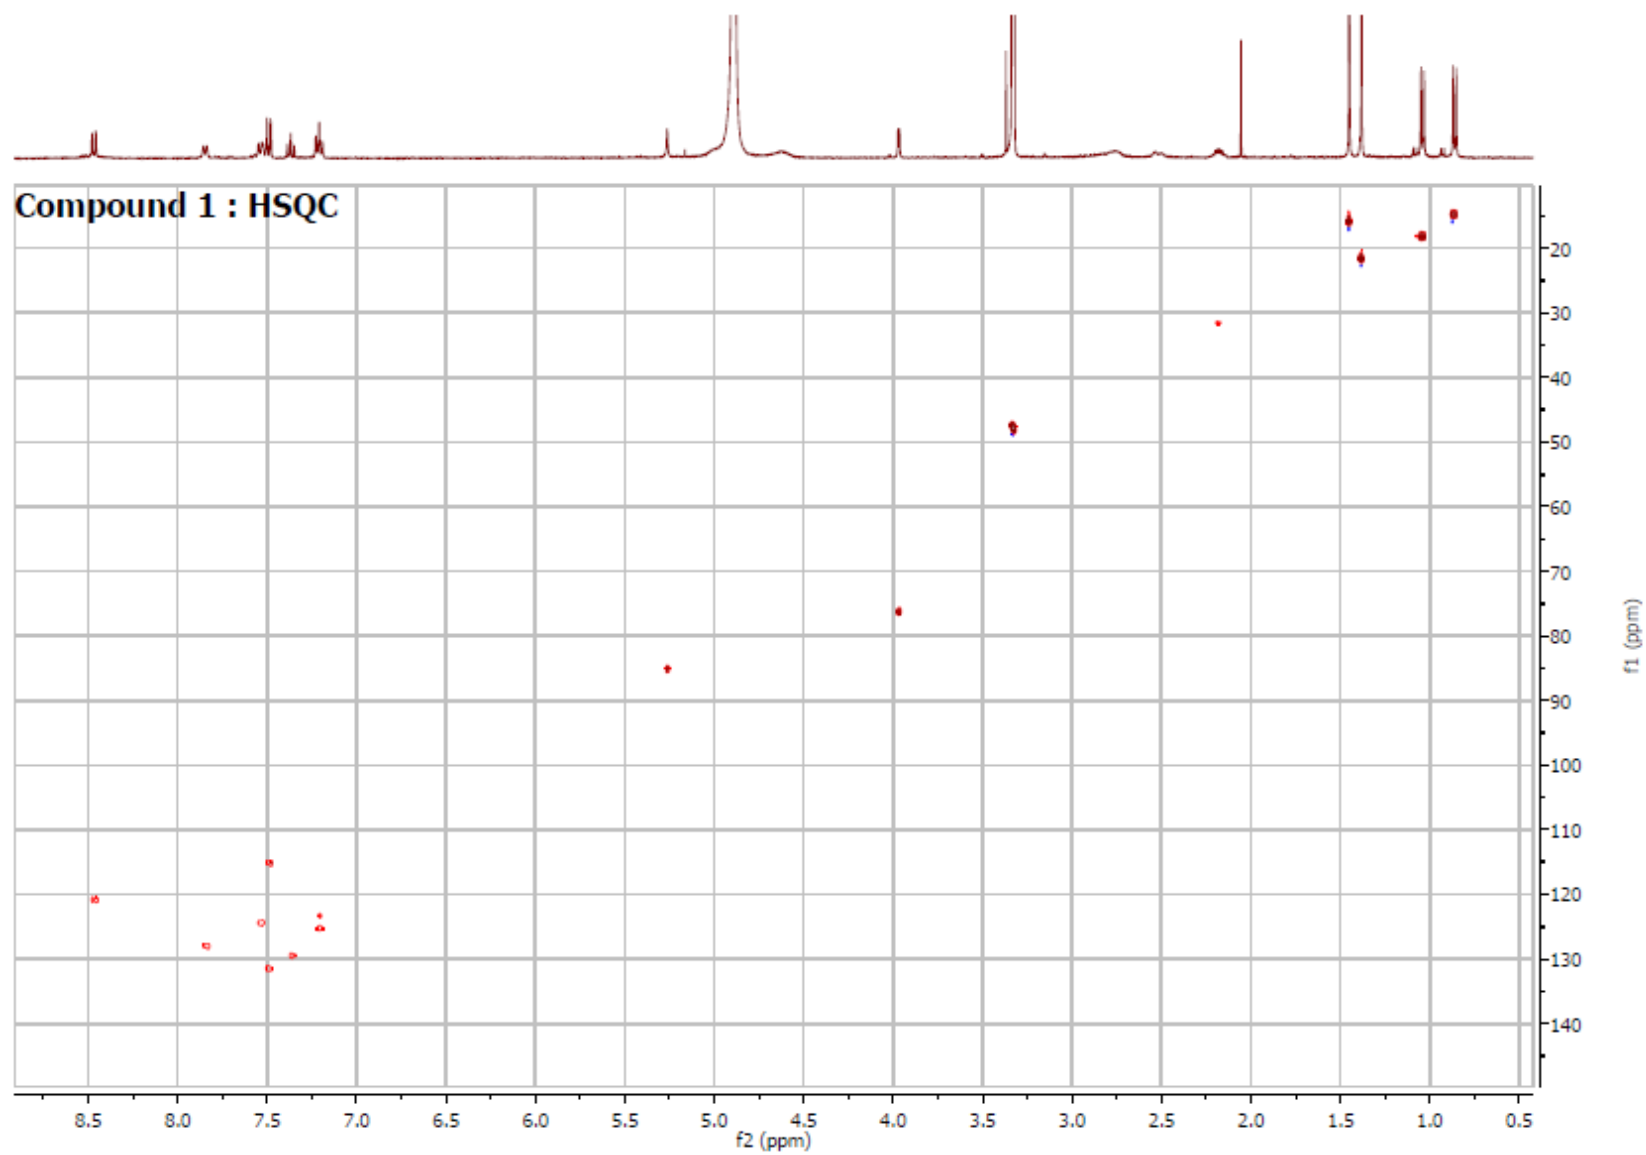

Figure S4: COSY spectrum of compound 1 in CD<sub>3</sub>OD (400MHz)

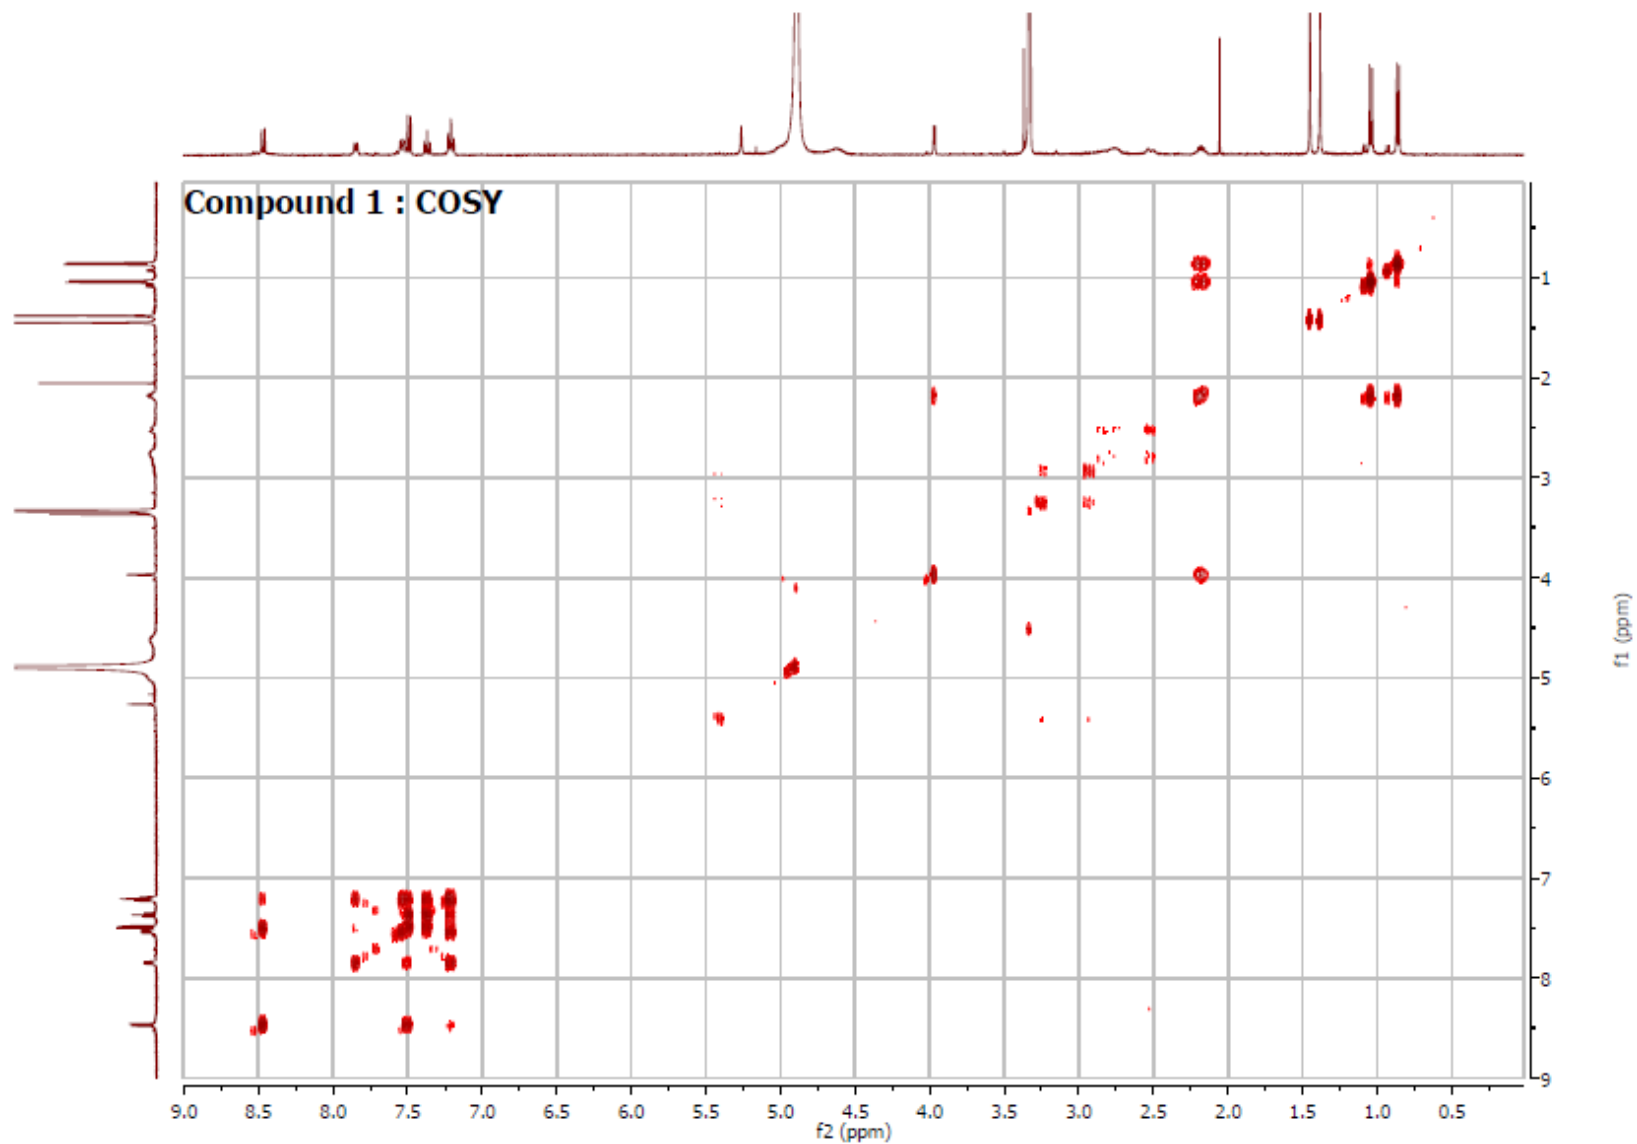

Figure S5: HMBC spectrum of compound 1 in CD<sub>3</sub>OD (400MHz)

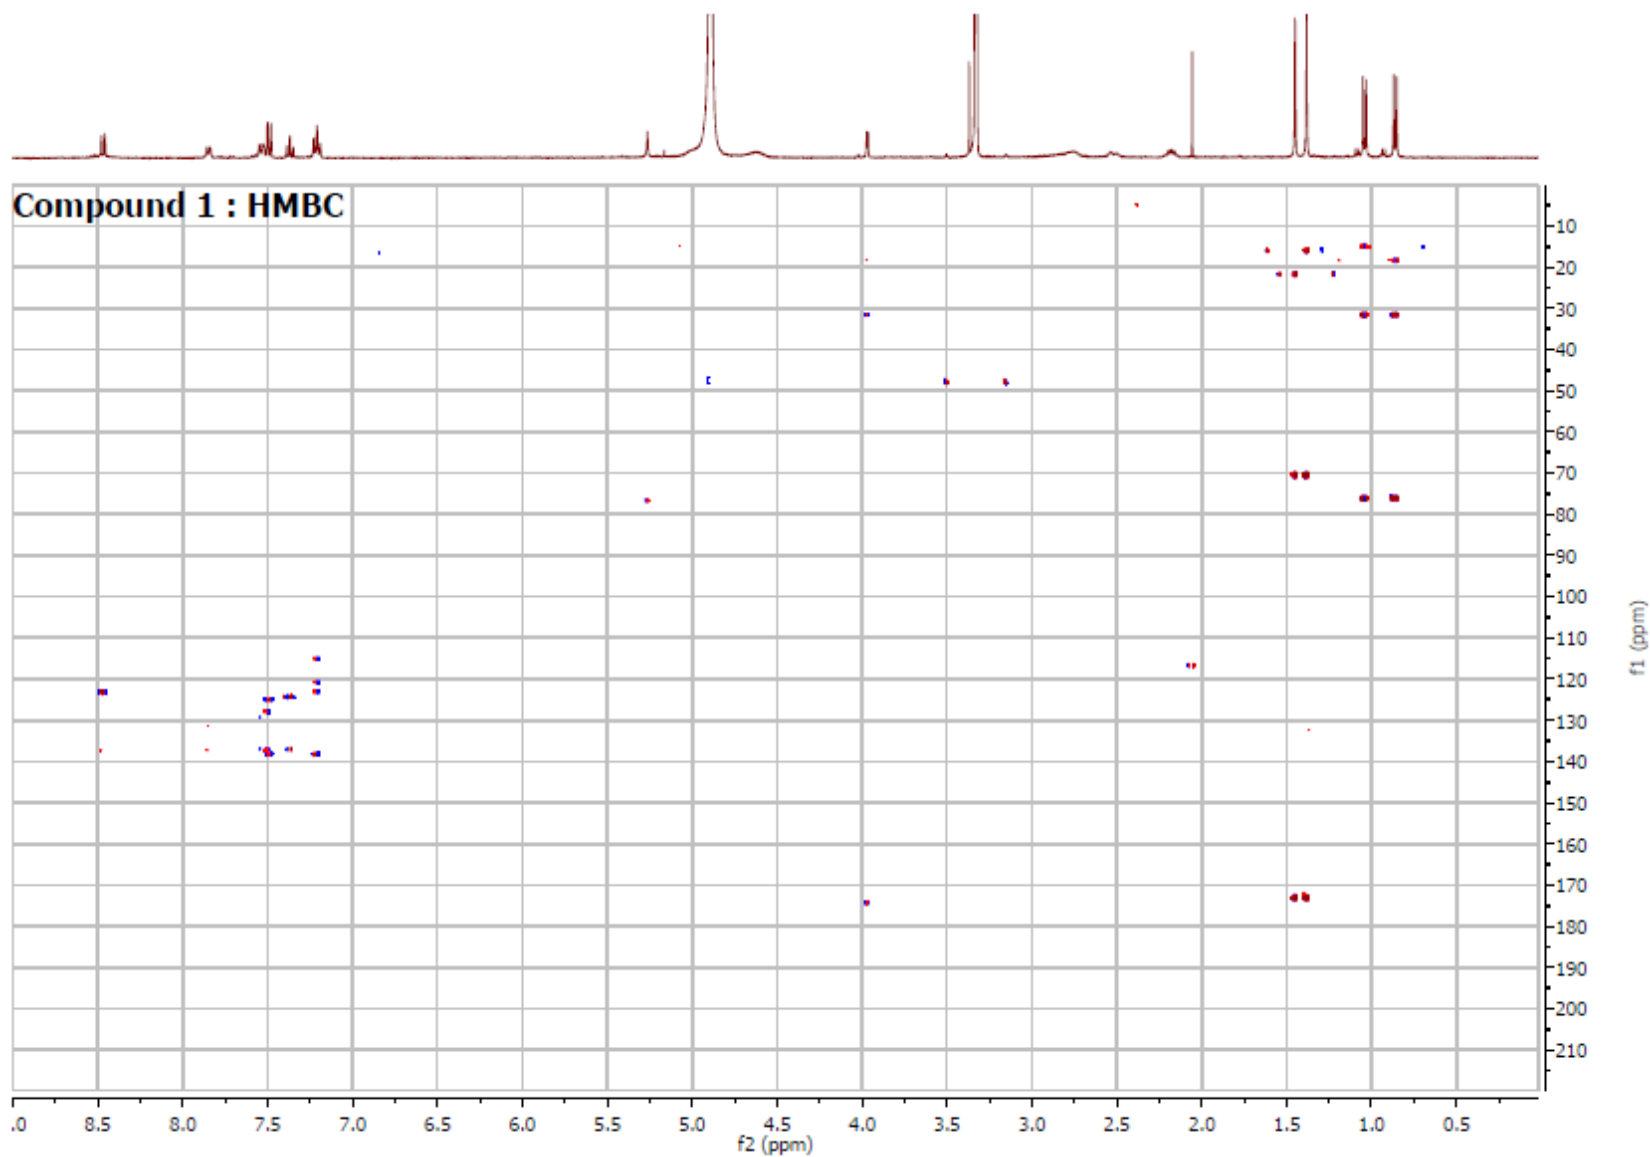

Figure S6: IR spectrum of compound 1

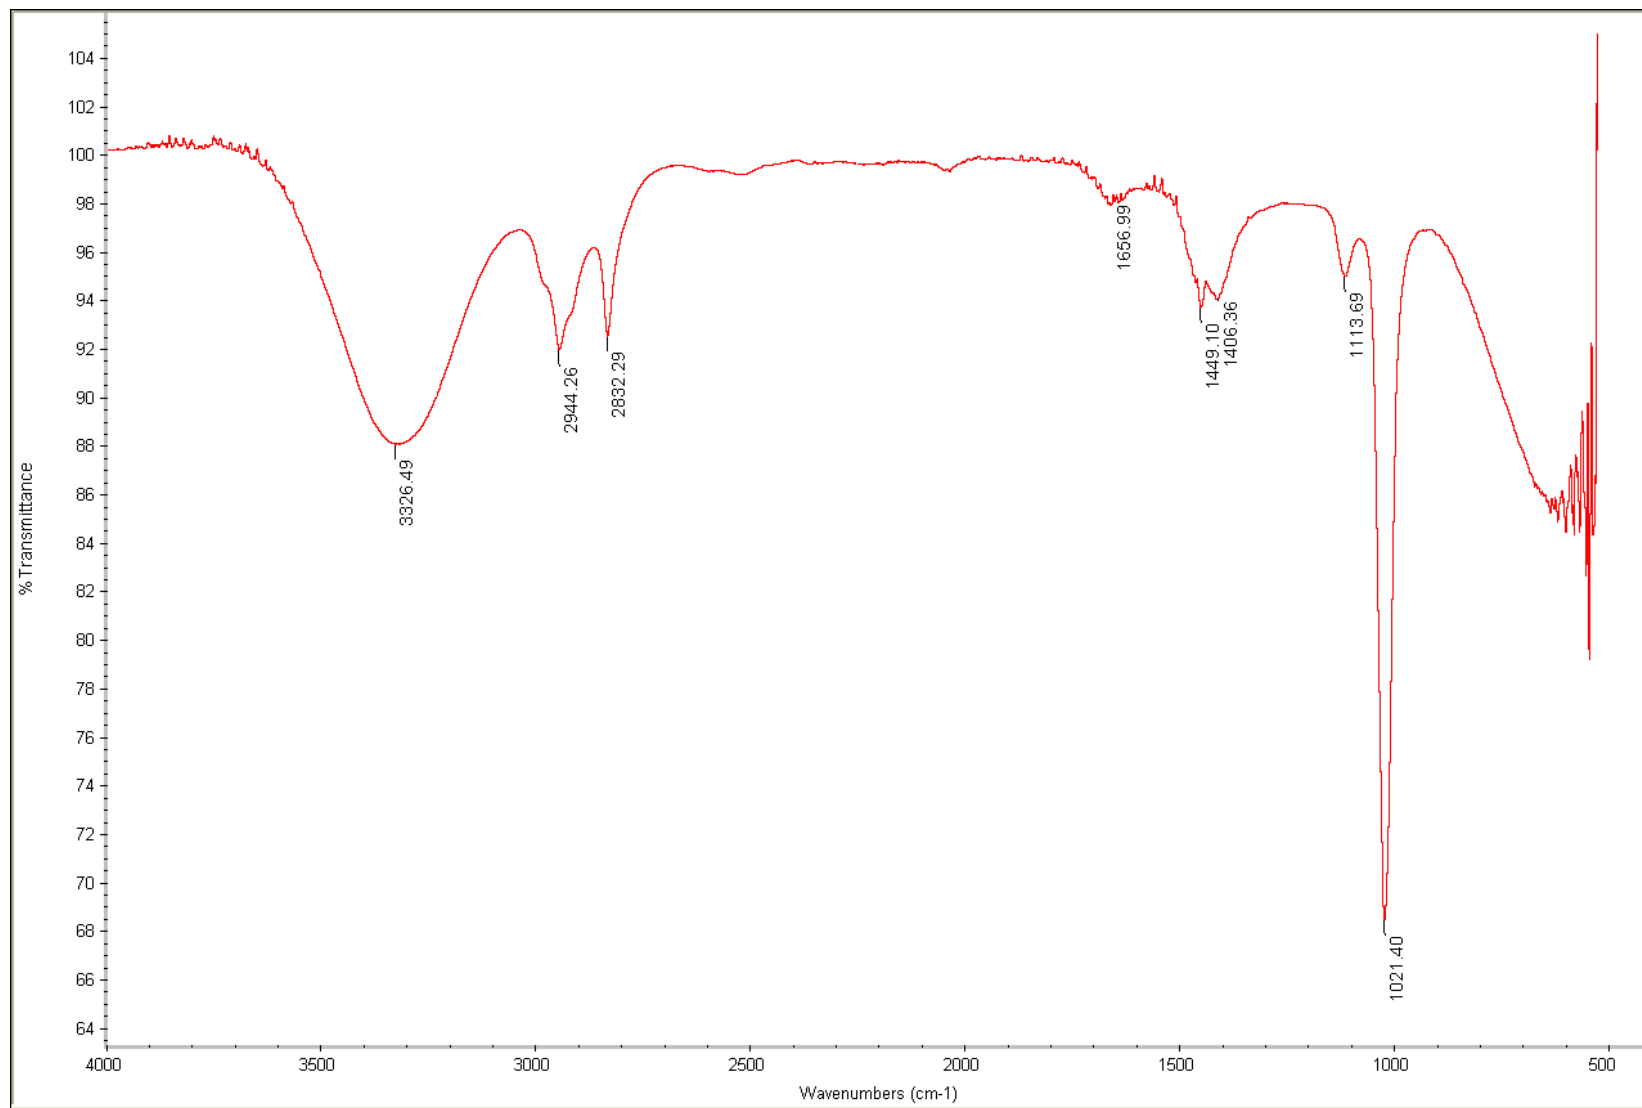



Figure S7: HRESIMS of compound 2

KH Ahammad Zaman ZS 14

SYNAPT G2-Si#NotSet

Synapt\_23670a 383 (3.552)

14:09:13

1: TOF MS ES+

7.29e5

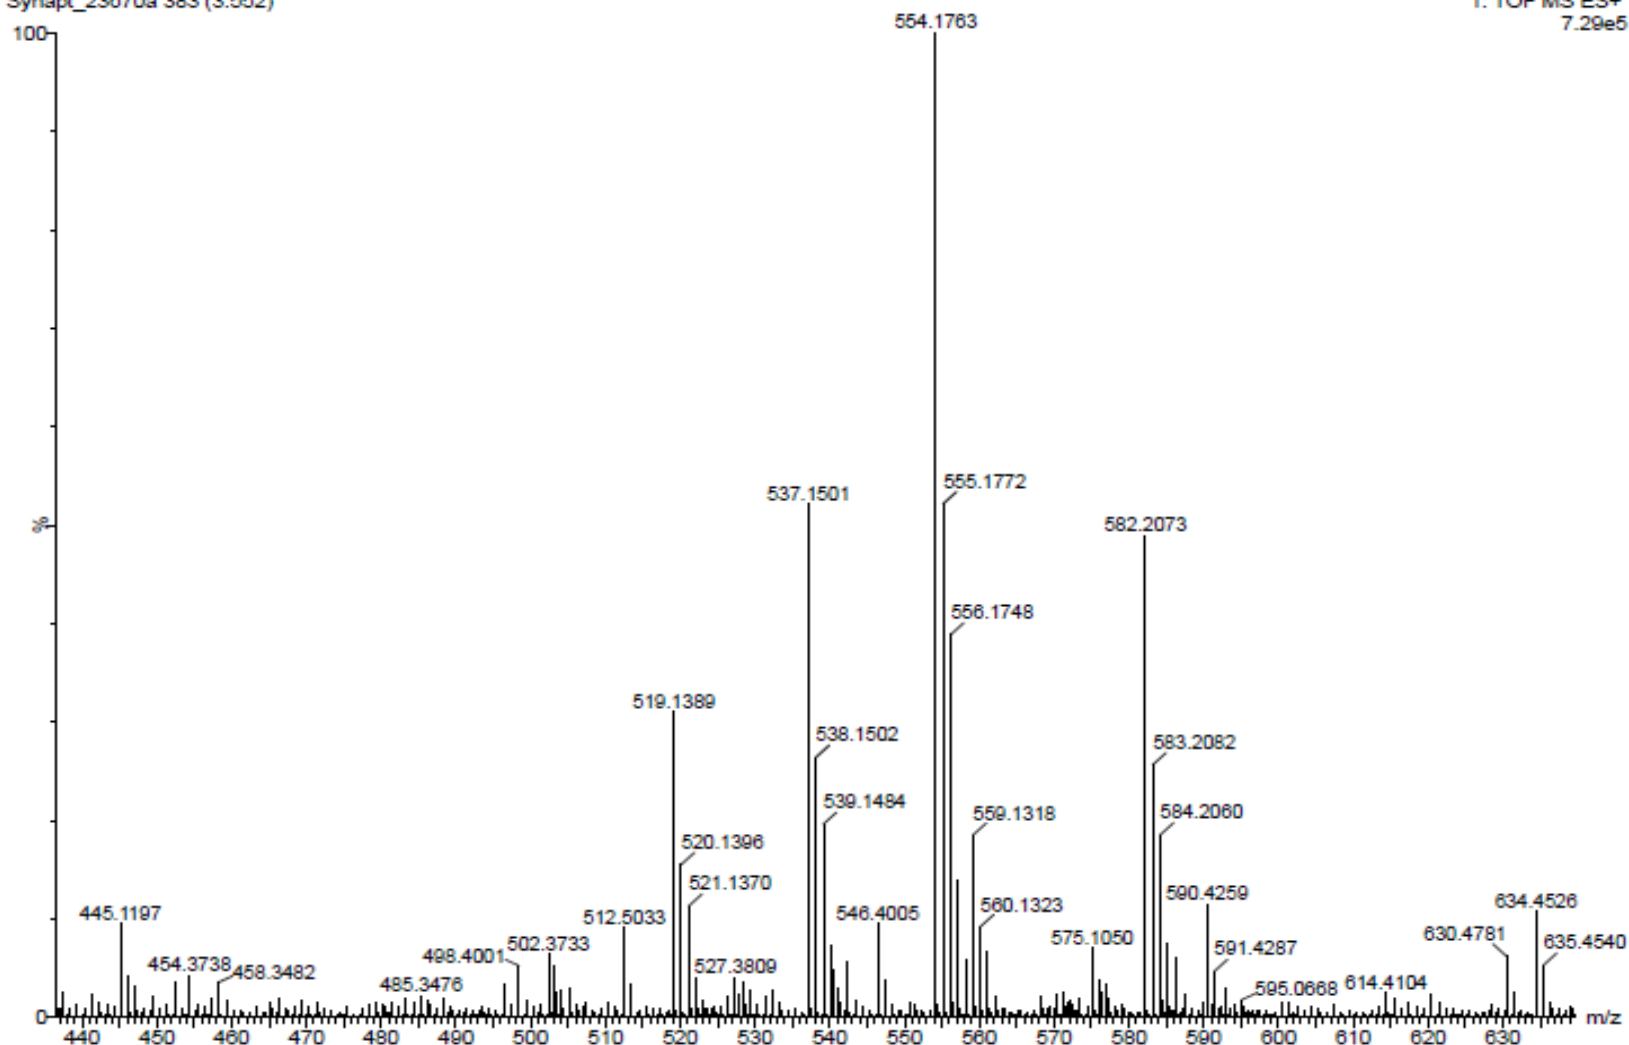

Figure S8:  $^1\text{H}$  NMR spectrum of compound 2 in  $\text{CD}_3\text{OD}$  (400MHz)

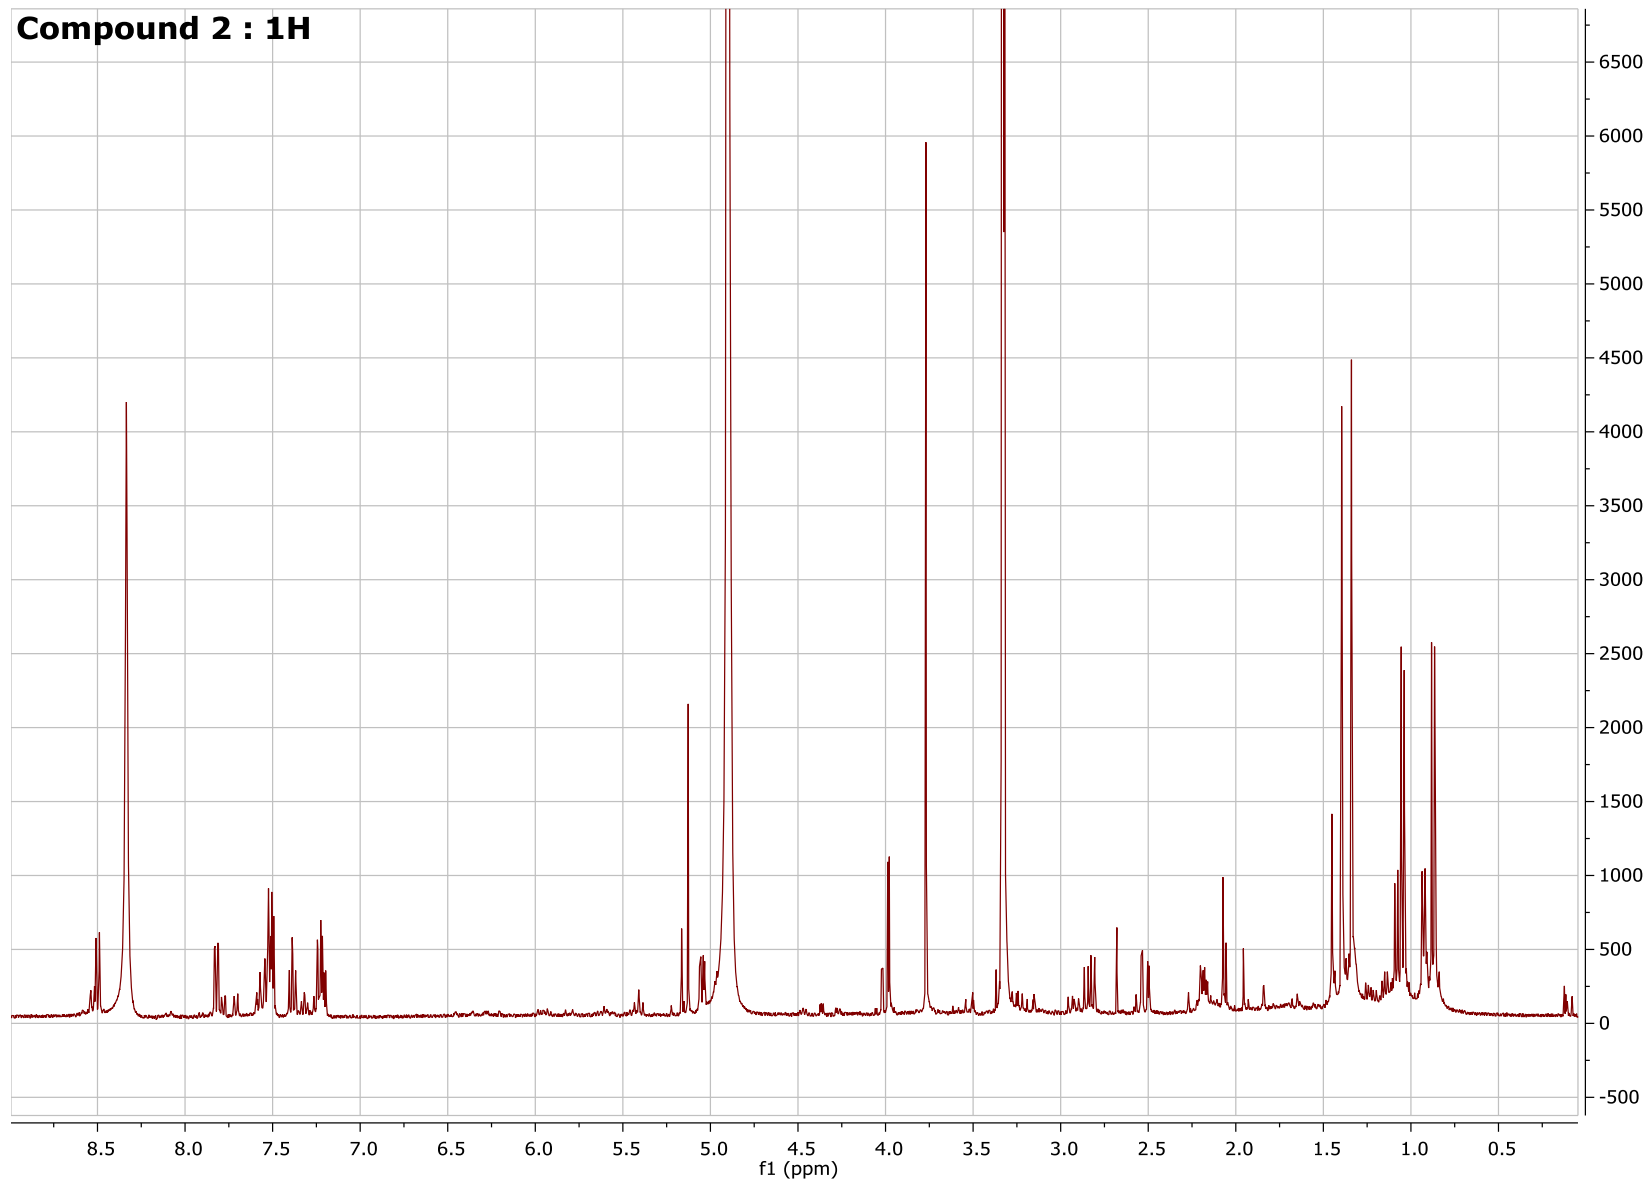

Figure S9: HSQC spectrum of compound 2 in CD<sub>3</sub>OD (400MHz)

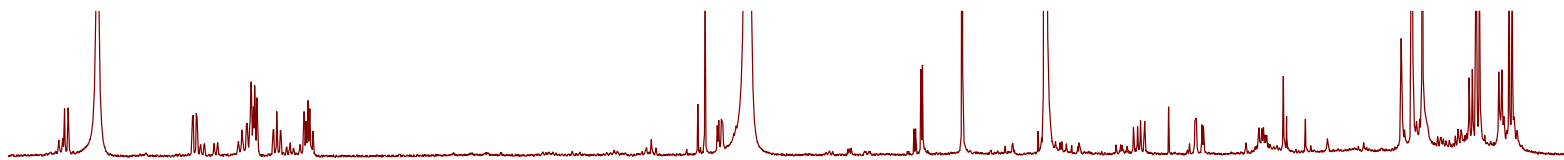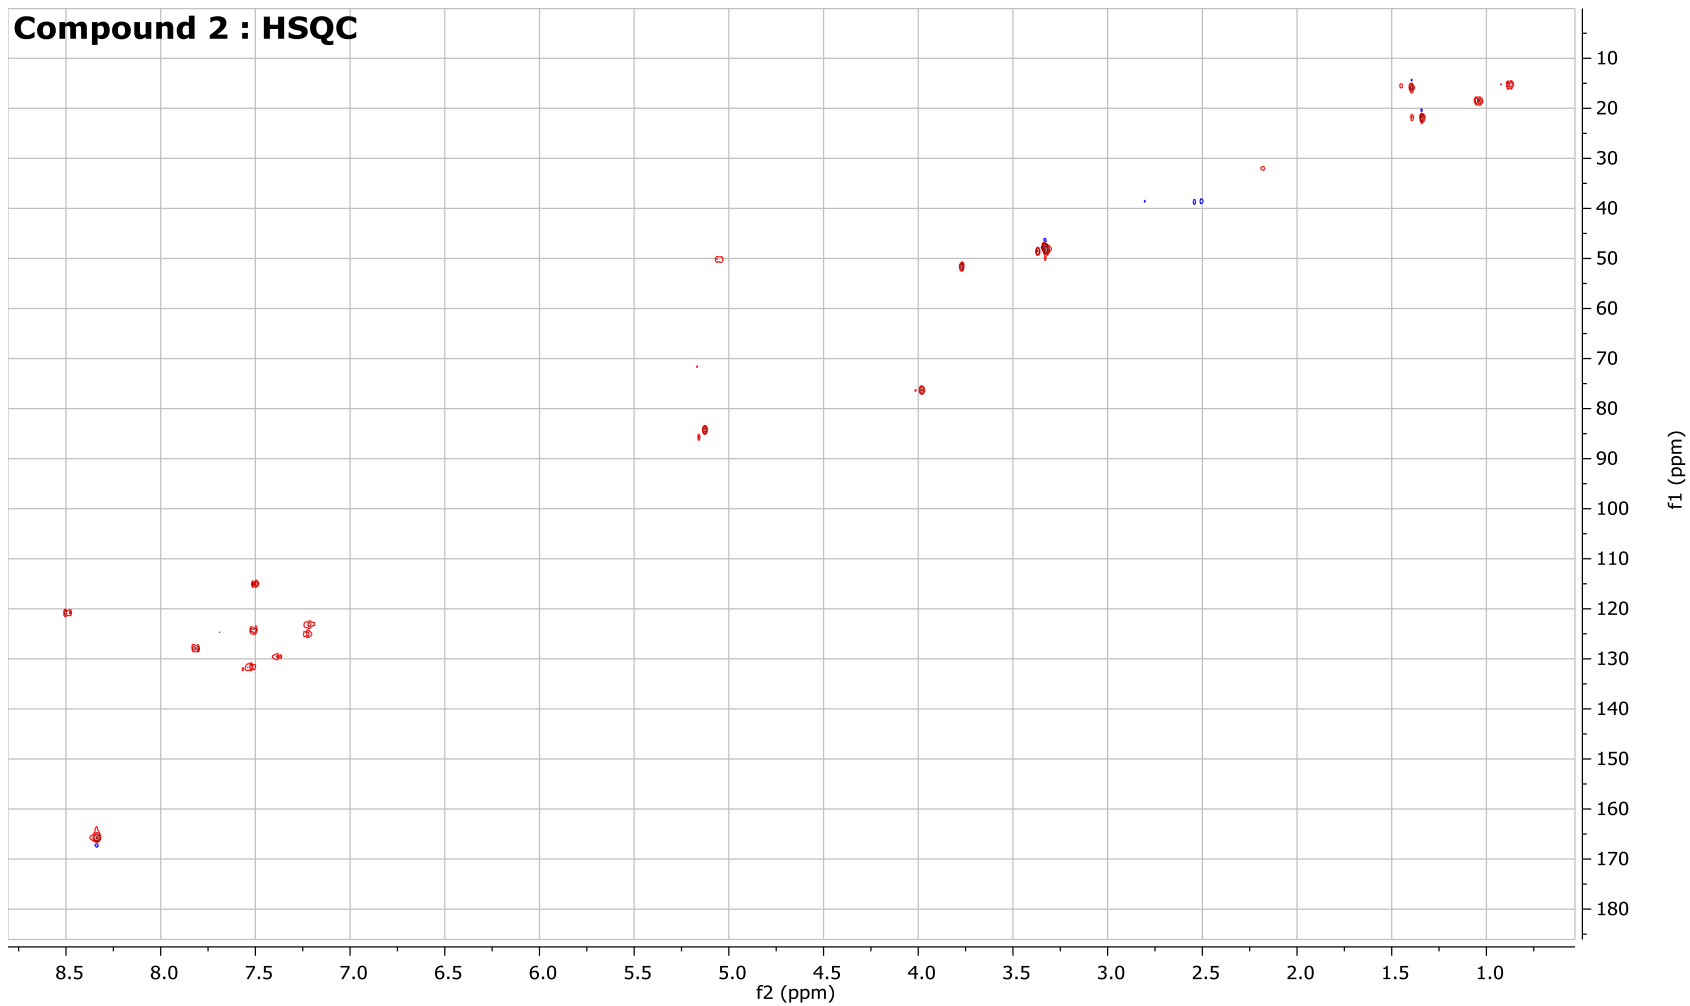

Figure S10: COSY spectrum of compound 2 in CD<sub>3</sub>OD (400MHz)

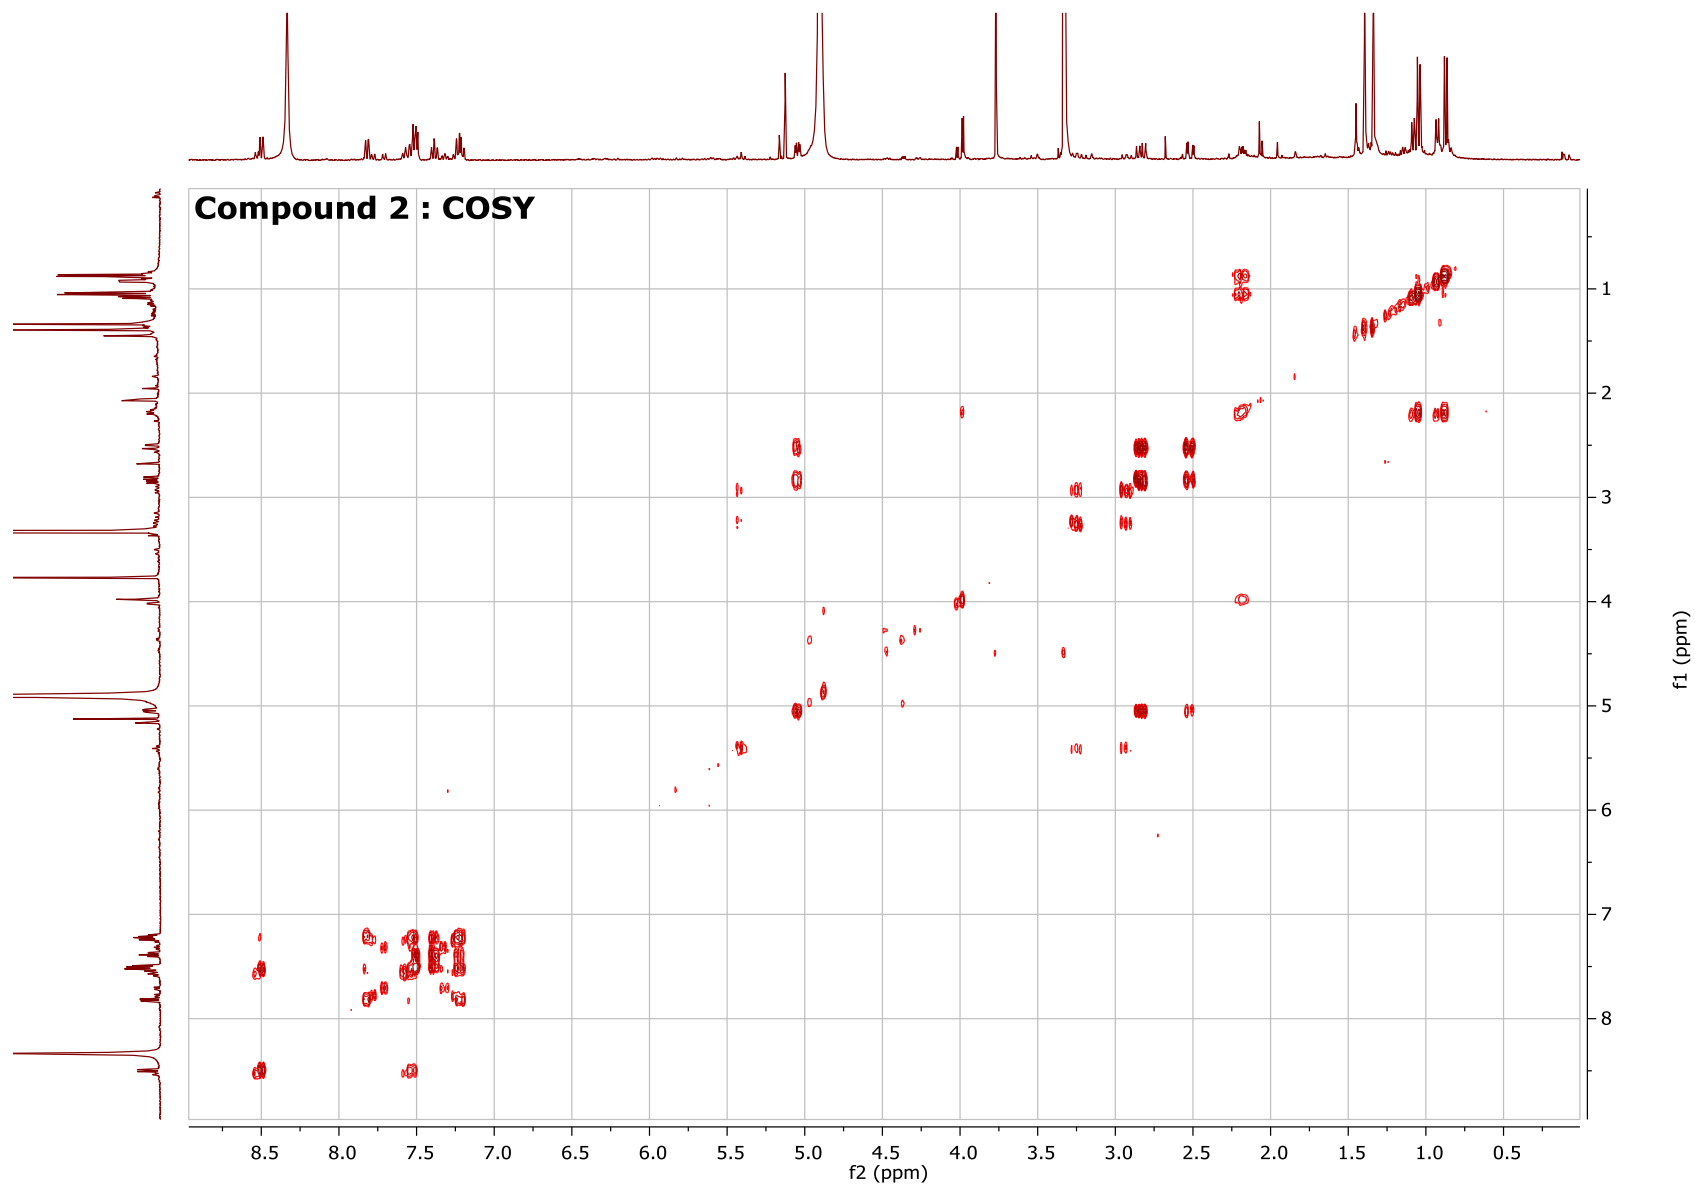

**Figure S11: HMBC spectrum of compound 2 in CD<sub>3</sub>OD (400MHz)**

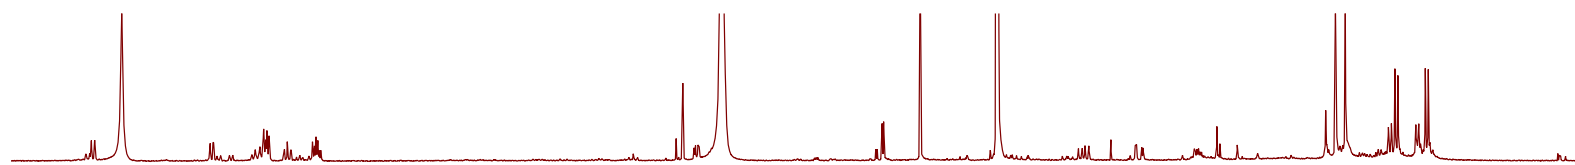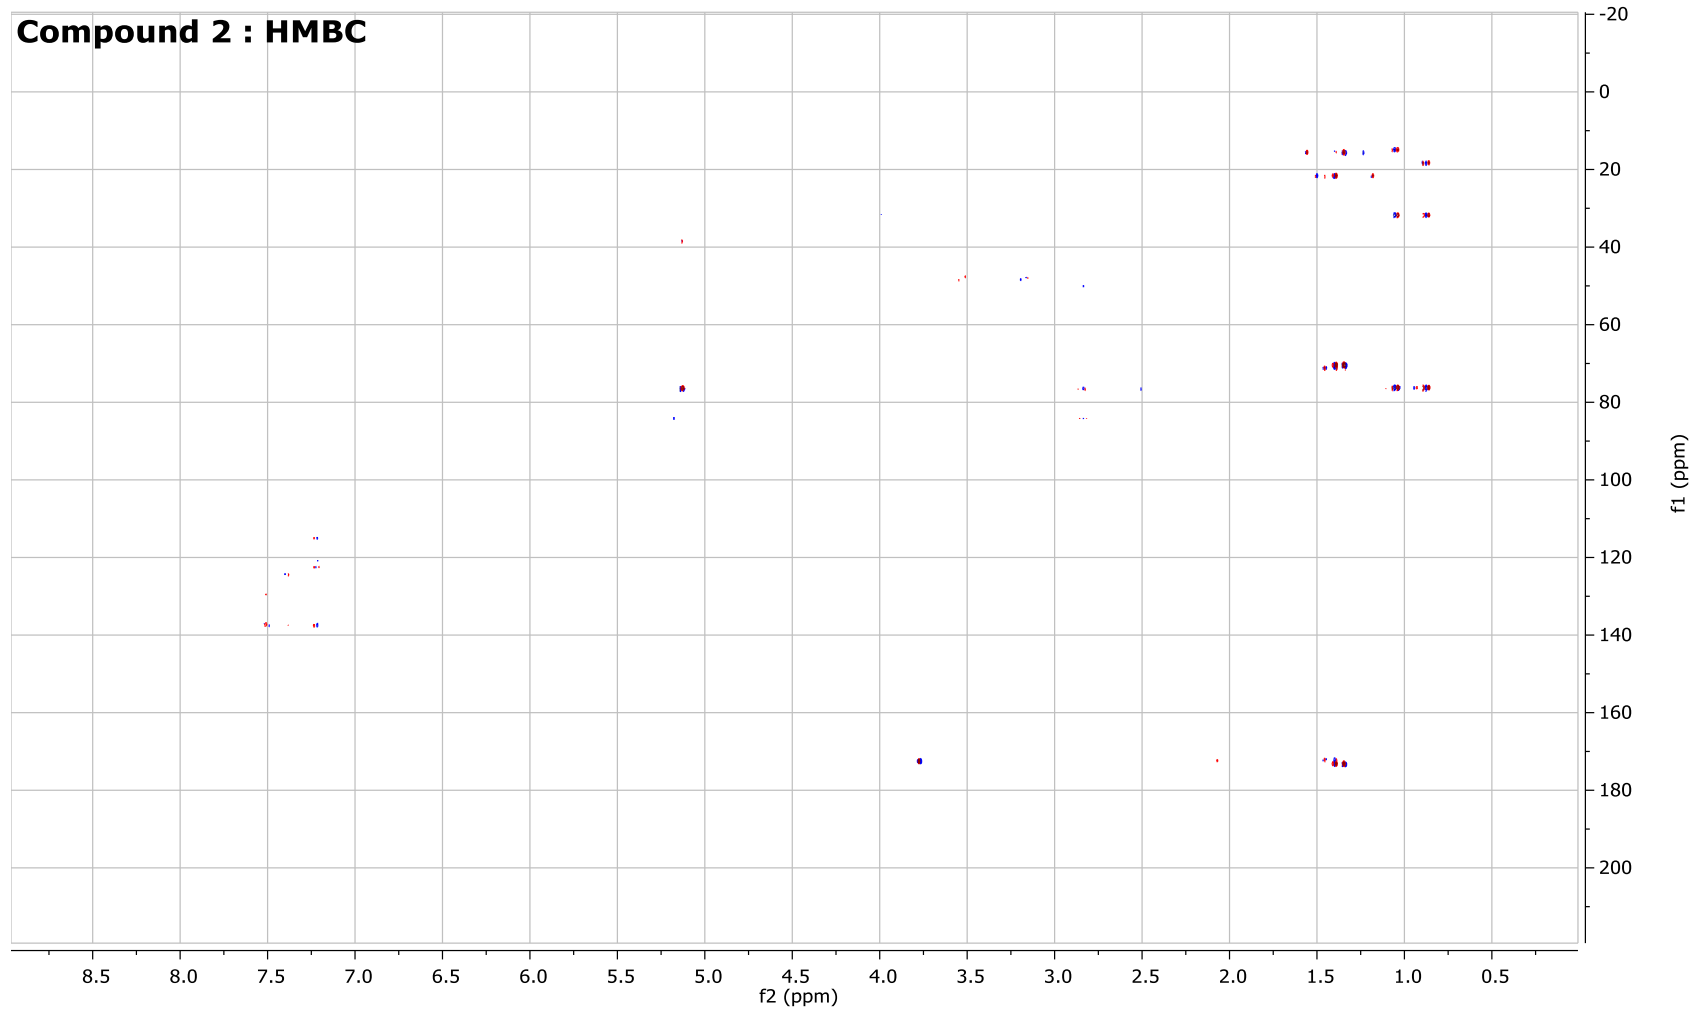

**Figure S12: IR spectrum of compound 2**

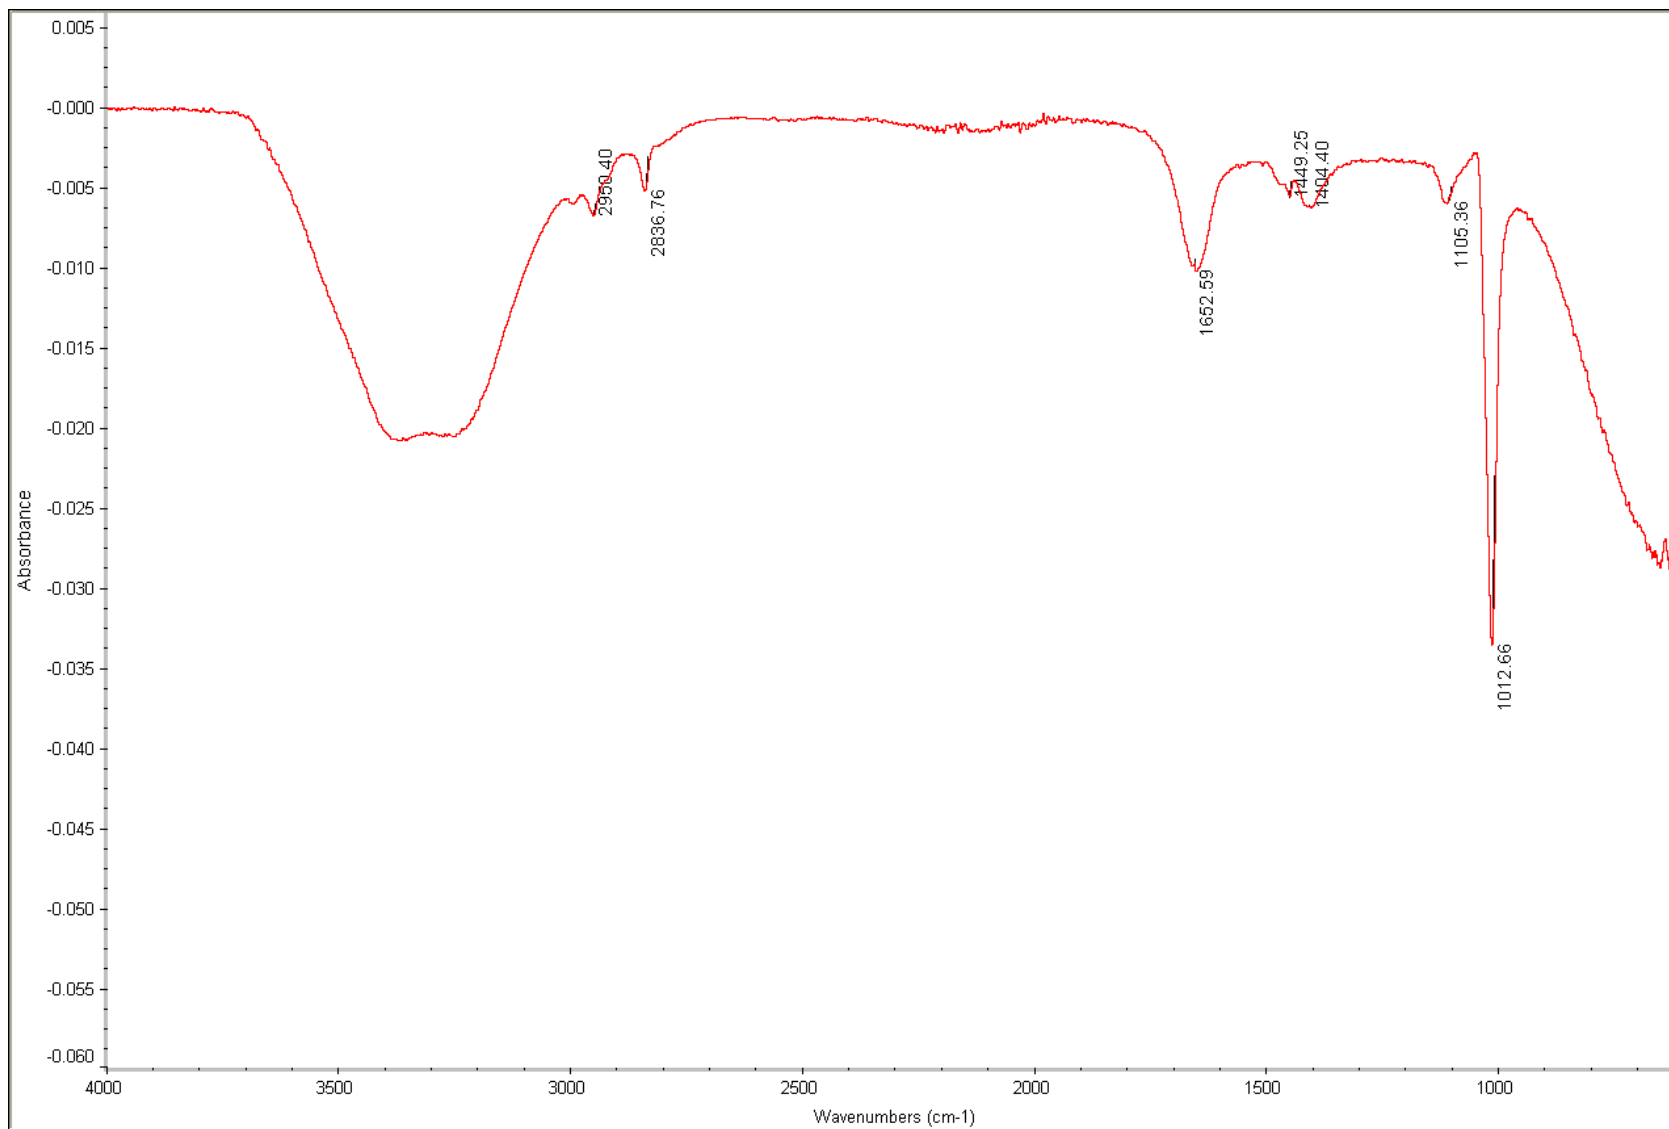

Supplement: NIHMS1565555-supplement-1.pdf [file NIHMS1565555-supplement-1.pdf]
